# Supplementary material for: Radiation-Induced Cellular Senescence Reduces Susceptibility of Glioblastoma Cells to Oncolytic Vaccinia Virus
Source: MDPI journal article supplement (doi:10.3390/cancers15133341), 2023-06-25
Supplement: s1 [file s1]

U87 Blots

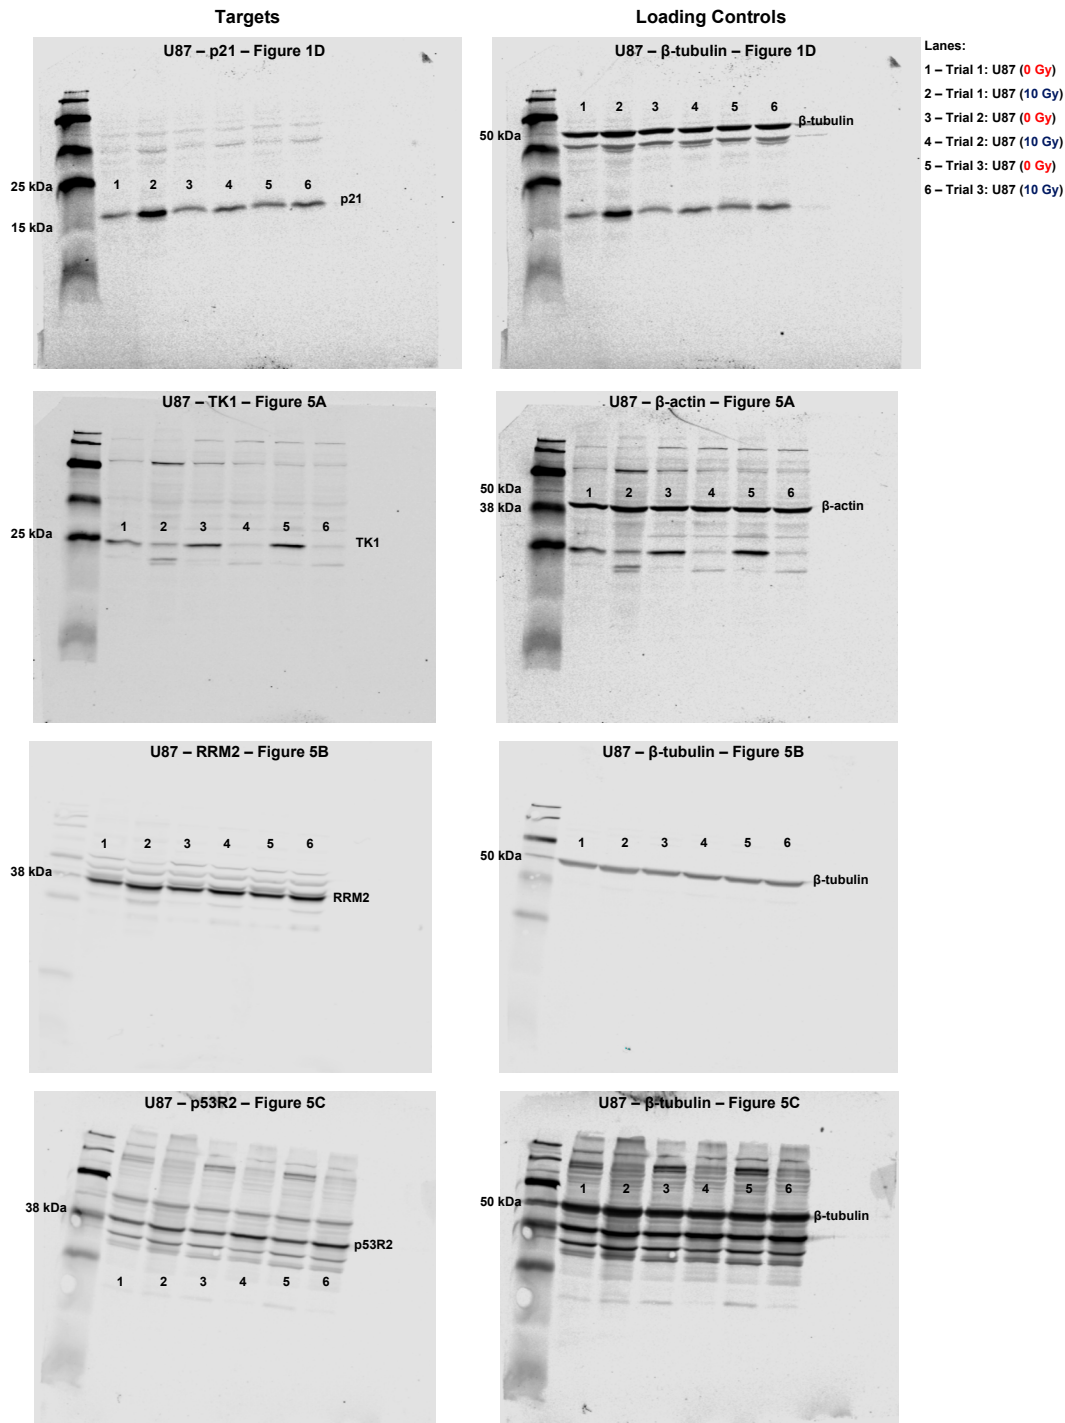

ED501 Blots

Targets

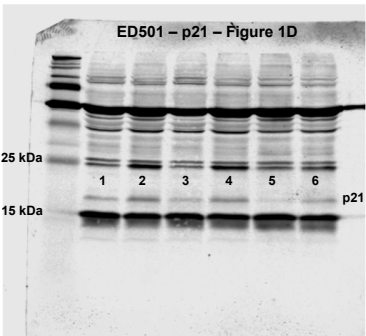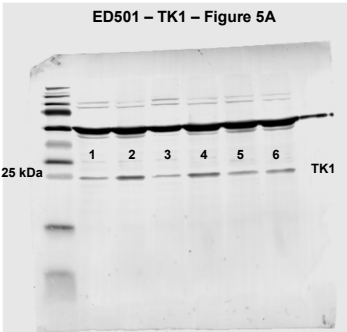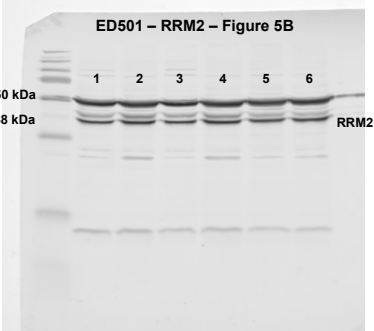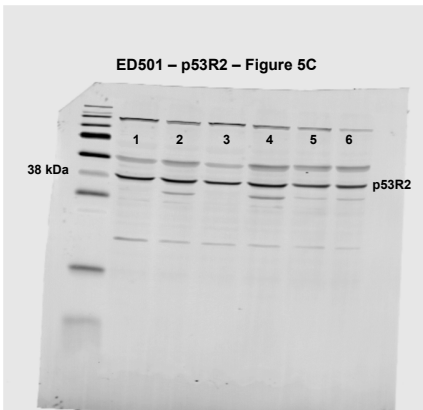

Loading Controls

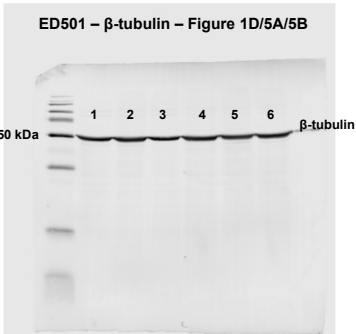

Same blot probed with p21, TK1, RRM2

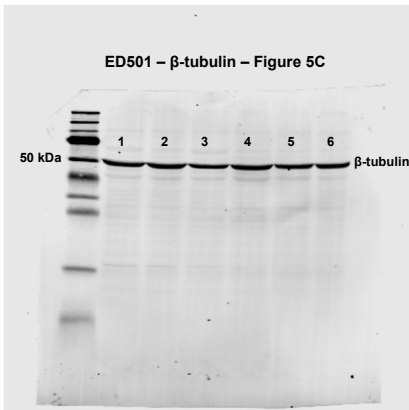

- Lanes:
- 1 – Trial 1: ED501 (0 Gy)
  - 2 – Trial 1: ED501 (10 Gy)
  - 3 – Trial 2: ED501 (0 Gy)
  - 4 – Trial 2: ED501 (10 Gy)
  - 5 – Trial 3: ED501 (0 Gy)
  - 6 – Trial 3: ED501 (10 Gy)

T98 Blots

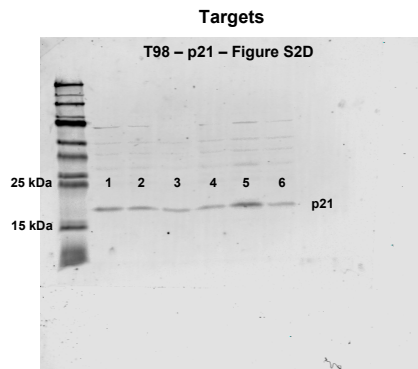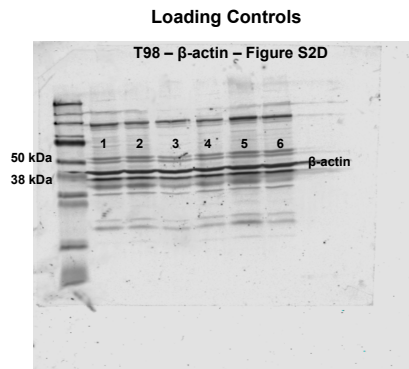

- Lanes:
- 1 – Trial 1: T98 (0 Gy)
  - 2 – Trial 1: T98 (10 Gy)
  - 3 – Trial 2: T98 (0 Gy)
  - 4 – Trial 2: T98 (10 Gy)
  - 5 – Trial 3: T98 (0 Gy)
  - 6 – Trial 3: T98 (10 Gy)

U118 Blots

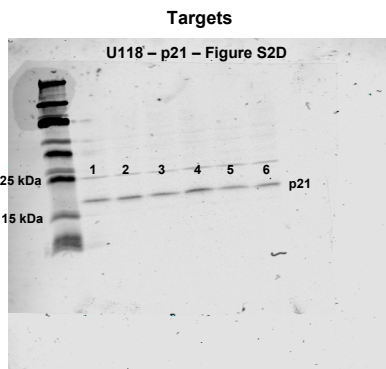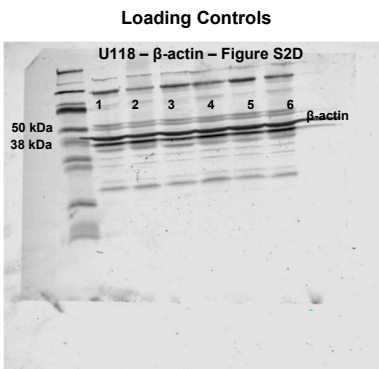

- Lanes:
- 1 – Trial 1: U118 (0 Gy)
  - 2 – Trial 1: U118 (10 Gy)
  - 3 – Trial 2: U118 (0 Gy)
  - 4 – Trial 2: U118 (10 Gy)
  - 5 – Trial 3: U118 (0 Gy)
  - 6 – Trial 3: U118 (10 Gy)
